# Supplementary material for: Second harmonic generation on chiral cyanido-bridged FeII–NbIVspin-crossover complexes
Source: Royal Society of Chemistry journal article supplement (doi:10.1039/d1dt01324f), 2021-01-01
Supplement: d1dt01324f1.pdf [file d1dt01324f1.pdf]

## Second Harmonic Generation on Chiral Cyanido-Bridged Fe<sup>II</sup>-Nb<sup>IV</sup> Spin Crossover Complexes

Shintaro Kawabata,<sup>a</sup> Koji Nakabayashi,<sup>a\*</sup> Kenta Imoto,<sup>a</sup> Stephen Klimke,<sup>b</sup>  
Franz Renz,<sup>b</sup> and Shin-ichi Ohkoshi,<sup>a\*</sup>

<sup>a</sup>Department of Chemistry, School of Science, The University of Tokyo  
7-3-1 Hongo, Bunkyo-ku, Tokyo 113-0033, Japan.

<sup>b</sup>Institute of Inorganic Chemistry, Leibniz University Hannover,  
Callinstrasse 9, 30167 Hannover, Germany

\*To whom correspondence should be addressed  
E-mail: ohkoshi@chem.s.u-tokyo.ac.jp

| Table of Contents:                                                                                                                     | Page     |
|----------------------------------------------------------------------------------------------------------------------------------------|----------|
| 1 IR spectra of <i>rac</i> -FeNb, <i>R</i> -FeNb, and <i>S</i> -FeNb (Figure S1)                                                       | S2       |
| 2 SEM images of <i>rac</i> -FeNb, <i>R</i> -FeNb, and <i>S</i> -FeNb (Figure S2)                                                       | S3       |
| 3 PXRD patterns of <i>rac</i> -FeNb, <i>R</i> -FeNb, and <i>S</i> -FeNb (Figure S3)                                                    | S4       |
| 4 PXRD pattern and crystallographic data from Rietveld analysis of <i>rac</i> -FeNb (Figure S4, Table S1)                              | S5       |
| 5 Crystal structure of <i>rac</i> -FeNb (Figure S5)                                                                                    | S6       |
| 6 Subgroups of <i>Ia</i> $\bar{3}$ <i>d</i> in cubic system (Table S2)                                                                 | S7       |
| 7 Rietveld analysis of the PXRD patterns of <i>R</i> -FeNb (Figure S6)                                                                 | S7       |
| 8 Rietveld analysis of the PXRD patterns of <i>S</i> -FeNb (Figure S7)                                                                 | S8       |
| 9 The structure based on the Rietveld analysis for <i>S</i> -FeNb. (Figure S8)                                                         | S9       |
| 10 Bond lengths between Fe-N atoms obtained the Rietveld analyses of the PXRD patterns of <i>R</i> -FeNb and <i>S</i> -FeNb (Table S3) | S10      |
| 11 Variable-temperature PXRD patterns of <i>rac</i> -FeNb (Figure S9)                                                                  | S11      |
| 12 Rietveld analyses of the PXRD patterns of <i>rac</i> -FeNb at respective temperatures (Figure S10)                                  | S12,S13  |
| 13 Crystallographic data from Rietveld analyses of the PXRD patterns of <i>rac</i> -FeNb (Table S4)                                    | S14      |
| 14 Bond lengths between Fe-N atoms obtained the Rietveld analyses of the PXRD patterns of <i>rac</i> -FeNb (Table S5)                  | S15      |
| 15 <sup>57</sup> Fe Mössbauer spectra of <i>rac</i> -FeNb at 293 K (a) and 77 K (Figure S11)                                           | S16      |
| 16 <sup>57</sup> Fe Mössbauer spectra parameters (Table S6)                                                                            | S17      |
| 17 Variable-temperature solid-state UV-vis absorption spectra of <i>rac</i> -FeNb (Figure S12)                                         | S18      |
| 18 Temperature dependences of the UV-vis absorbances at 595 nm (Figure S13)                                                            | S19      |
| 19 $\chi_M T$ vs <i>T</i> plot of <i>rac</i> -FeNb (Figure S14)                                                                        | S20      |
| 20 Magnetic analysis for the $\chi_M T$ - <i>T</i> plot of <i>R</i> -FeNb, <i>S</i> -FeNb, and <i>rac</i> -FeNb (Figures S15-S17)      | S21, S22 |
| 21 The result of SHG measurement of <i>rac</i> -FeNb (Figure S18)                                                                      | S23      |

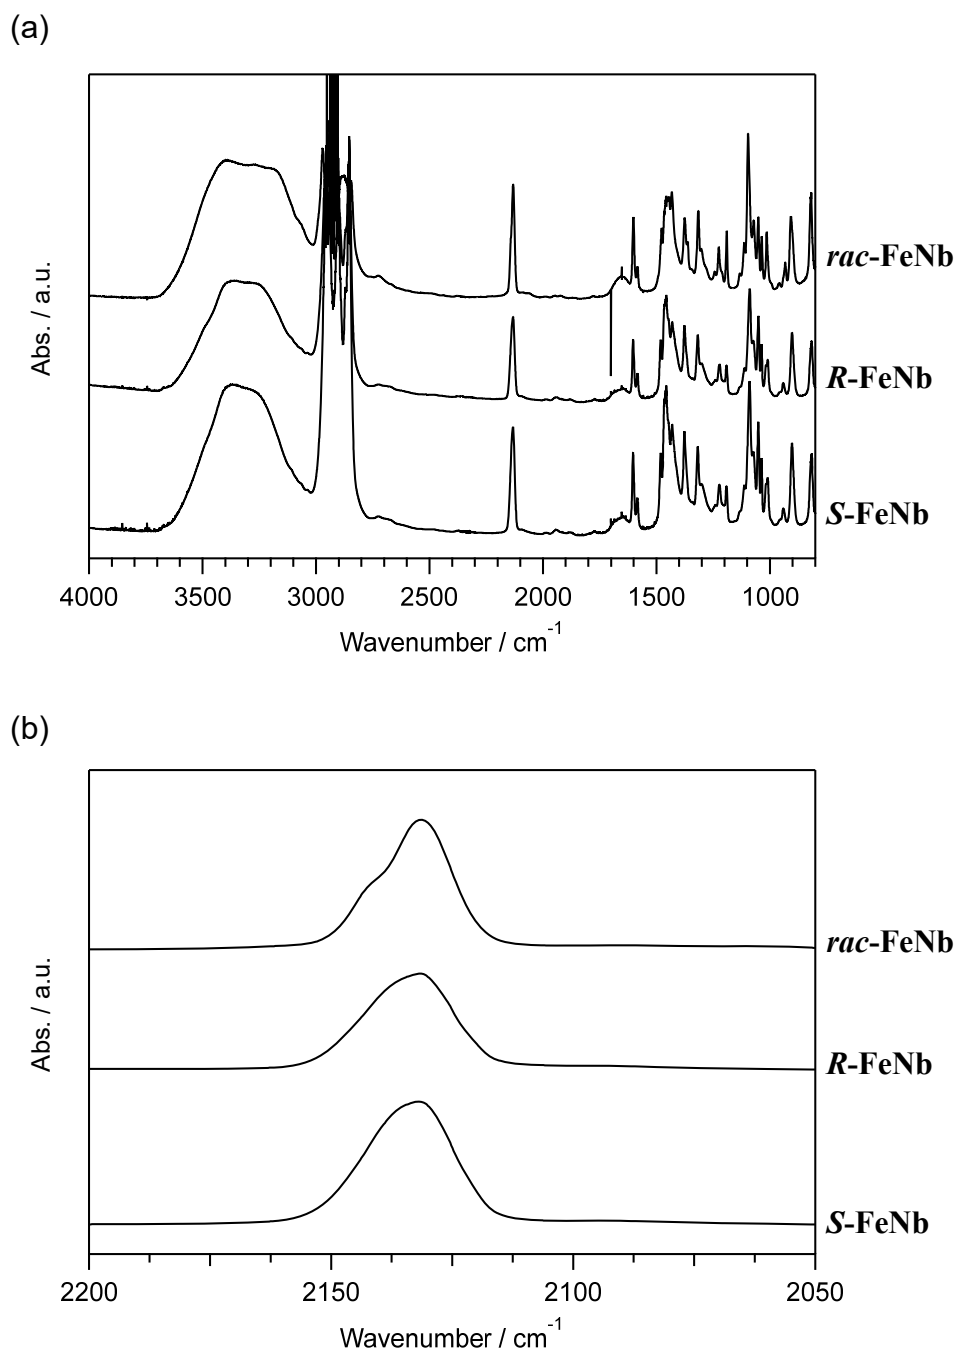

**Figure S1.** IR spectra of *rac*-FeNb, *R*-FeNb, and *S*-FeNb in the whole range (a) and in the range related to the CN<sup>-</sup> stretching vibrations (b) at room temperature.

***rac*-FeNb**

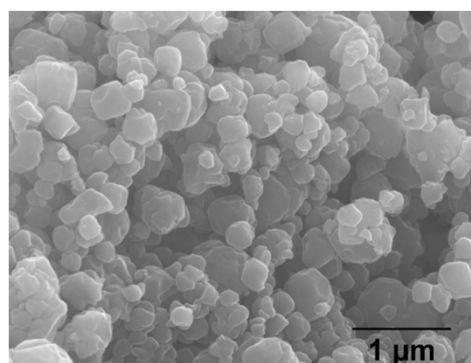

***R*-FeNb**

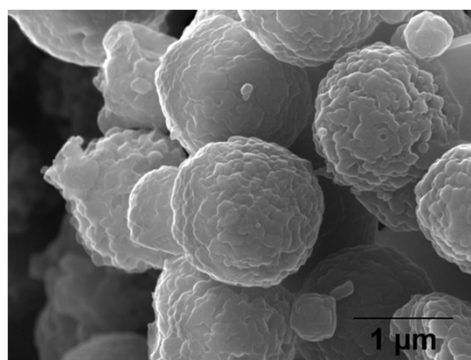

***S*-FeNb**

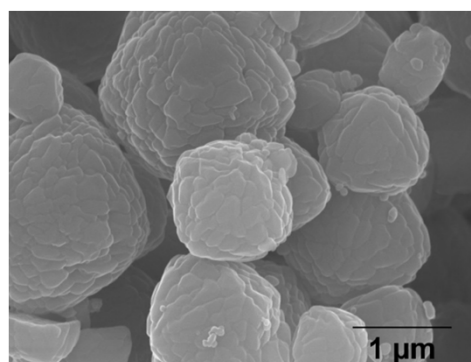

**Figure S2.** SEM images of *rac*-FeNb, *R*-FeNb, and *S*-FeNb.

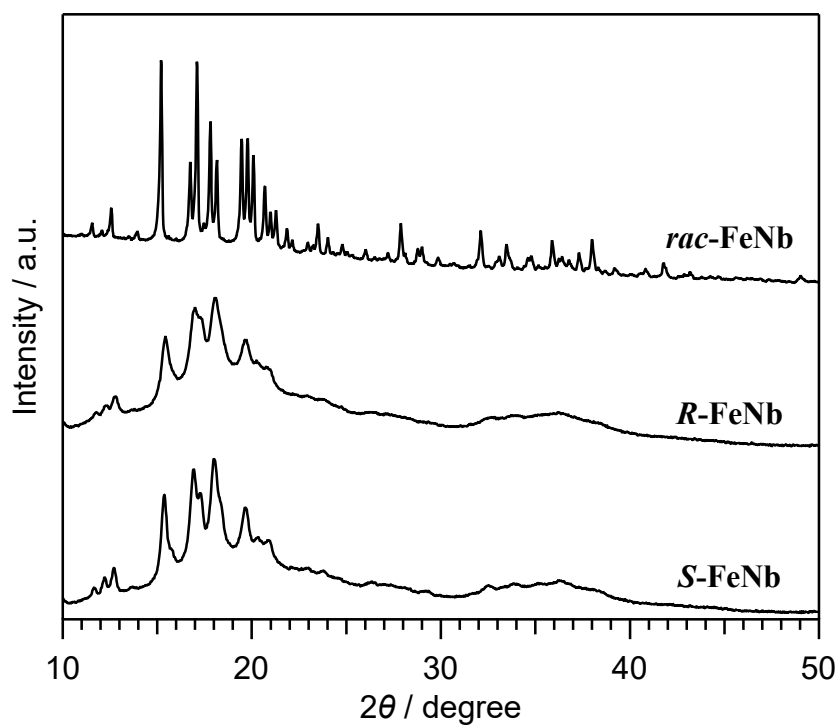

**Figure S3.** PXRD patterns of *rac*-FeNb, *R*-FeNb, and *S*-FeNb at room temperature.

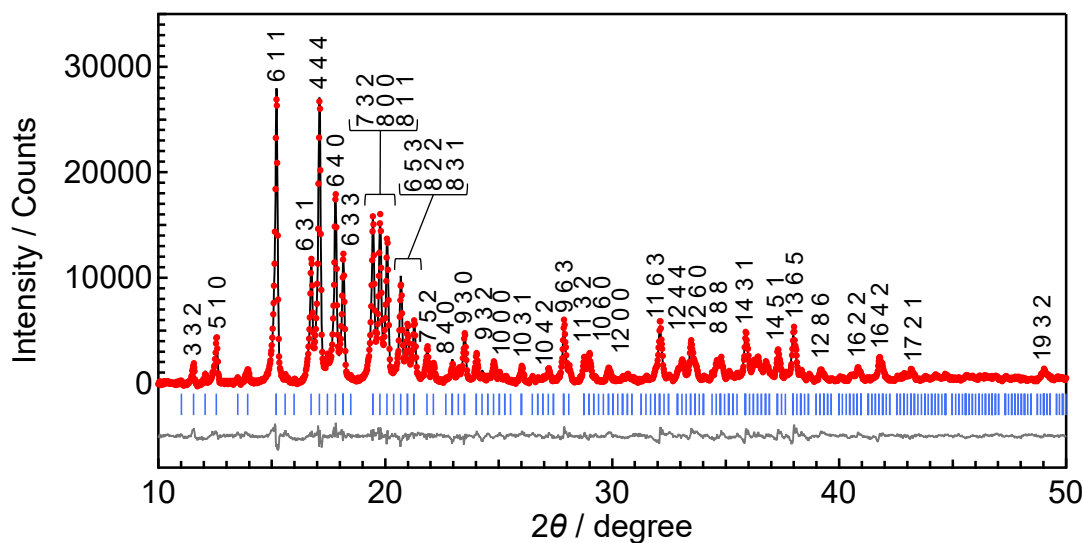

**Figure S4.** PXRD pattern and the result of Rietveld analysis for *rac*-FeNb at room temperature. Red dots, black line, blue bar, and gray line represent the experimental data, the calculated pattern, Bragg diffractions of the target compound, and residual curve, respectively.

**Table S1.** Crystallographic data from Rietveld analyses of the PXRD patterns of *rac*-FeNb at room temperature.

|                                |                 |
|--------------------------------|-----------------|
| Crystal system                 | Cubic           |
| Space group                    | $Im\bar{3}d$    |
| $a / \text{\AA}$               | 35.8996(5)      |
| $Z$                            | 24              |
| $V / \text{\AA}^3$             | 46255           |
| $d / \text{g cm}^{-3}$         | 1.30            |
| $R_{\text{wp}} / R_{\text{p}}$ | 0.0214 / 0.0164 |
| $S$                            | 1.97            |
| $T / \text{K}$                 | 294             |

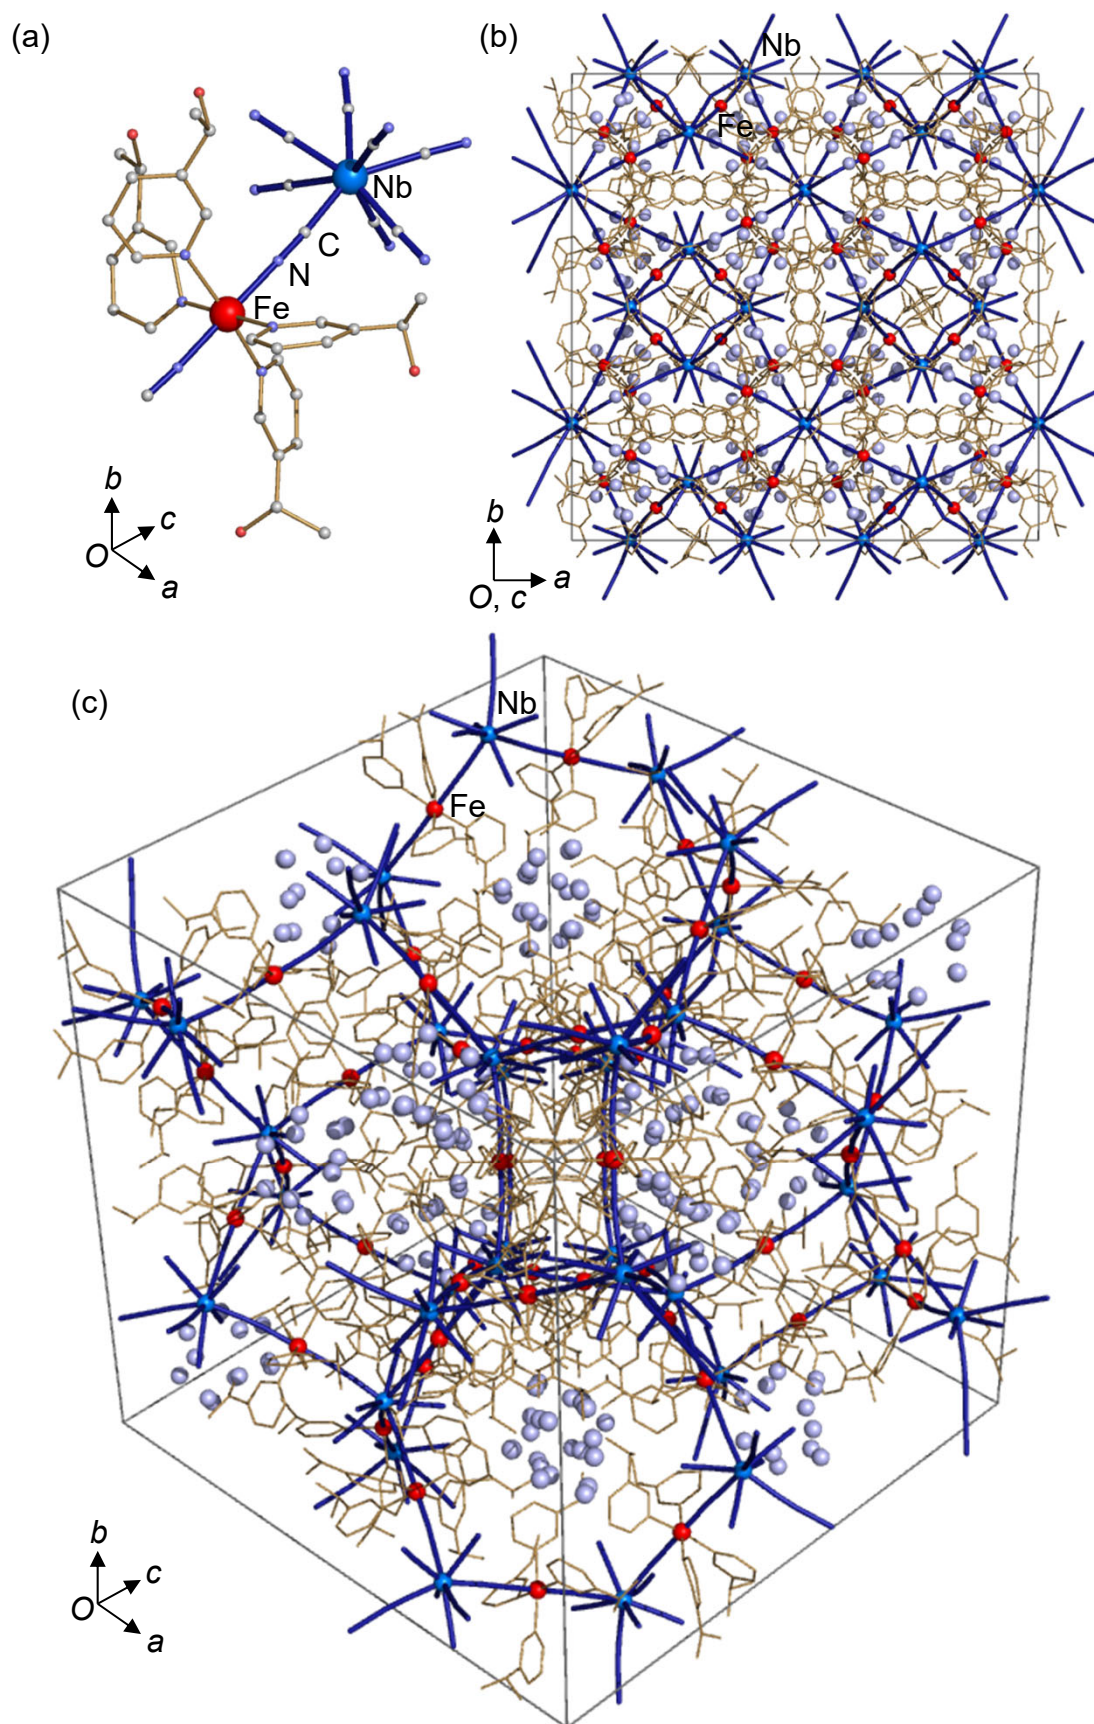

**Figure S5.** Crystal structure of *rac*-FeNb. (a) Coordination geometry. (b) View from the *c* axis. (c) View from the [111] direction. Red, blue, and light blue spheres show Fe, Nb, and O (water molecule) atoms, respectively. Light brown, blue thick line, and gray lines represent 1-(3-pyridyl)ethanol, 3-D cyanido-bridged coordination network, and the unite cell, respectively.

**Table S2.** Subgroups of  $Ia\bar{3}d$  in cubic system. The numbers in parentheses are respective space group numbers.

|                                          |                                          |                                     |
|------------------------------------------|------------------------------------------|-------------------------------------|
| <b><math>Ia\bar{3}d</math><br/>(230)</b> | <b><math>I\bar{4}3d</math><br/>(220)</b> | <b><math>I2_13</math><br/>(199)</b> |
|                                          | <b><math>I4_132</math><br/>(214)</b>     |                                     |
|                                          | <b><math>Ia\bar{3}</math><br/>(206)</b>  |                                     |

black: centrosymmetric; brown: non-centrosymmetric, achiral  
red: non-centrosymmetric, chiral  
blue: non-centrosymmetric, chiral but SHG inactive

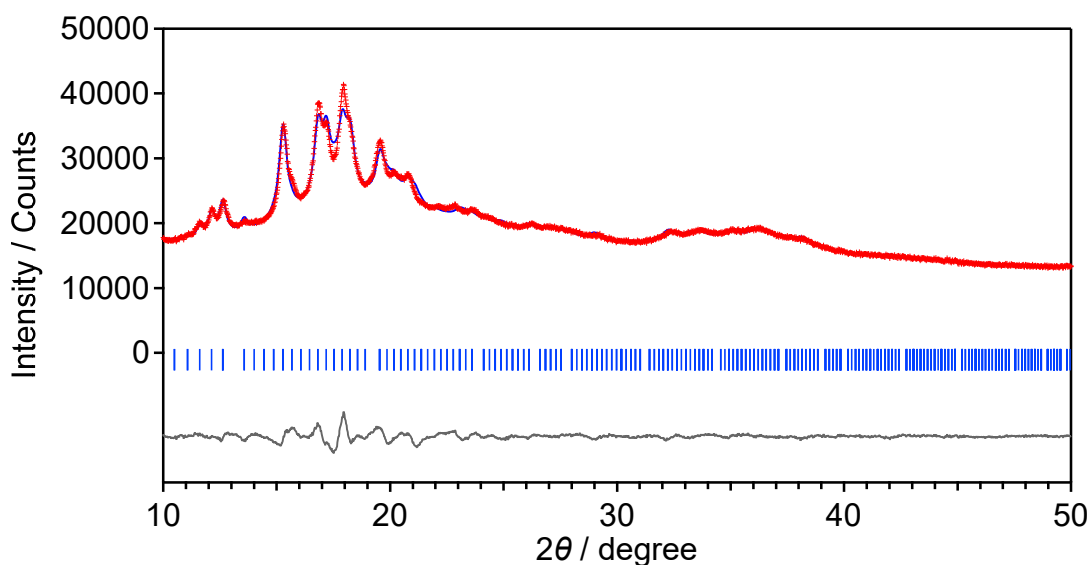

|                |                 |
|----------------|-----------------|
| Compound       | <b>R-FeNb</b>   |
| Crystal system | Cubic           |
| Space group    | $I2_13$         |
| $a / \text{Å}$ | 35.753(3)       |
| $R_{wp} / R_p$ | 0.0196 / 0.0135 |
| $S$            | 2.67            |

**Figure S6.** Rietveld analysis of the PXRD patterns of **R-FeNb** at room temperature.

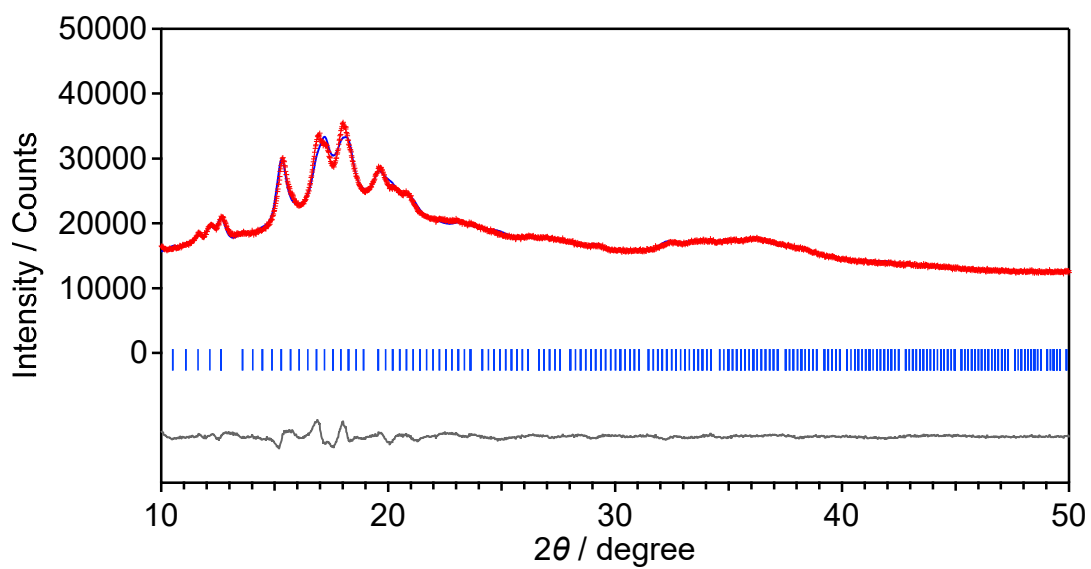

|                                |                 |
|--------------------------------|-----------------|
| Compound                       | <b>S-FeNb</b>   |
| Crystal family                 | Cubic           |
| Space group                    | $I2_13$         |
| $a / \text{\AA}$               | 35.709(4)       |
| $R_{\text{wp}} / R_{\text{p}}$ | 0.0178 / 0.0127 |
| $S$                            | 2.32            |

**Figure S7.** Rietveld analysis of the PXRD patterns of **S-FeNb** at room temperature.



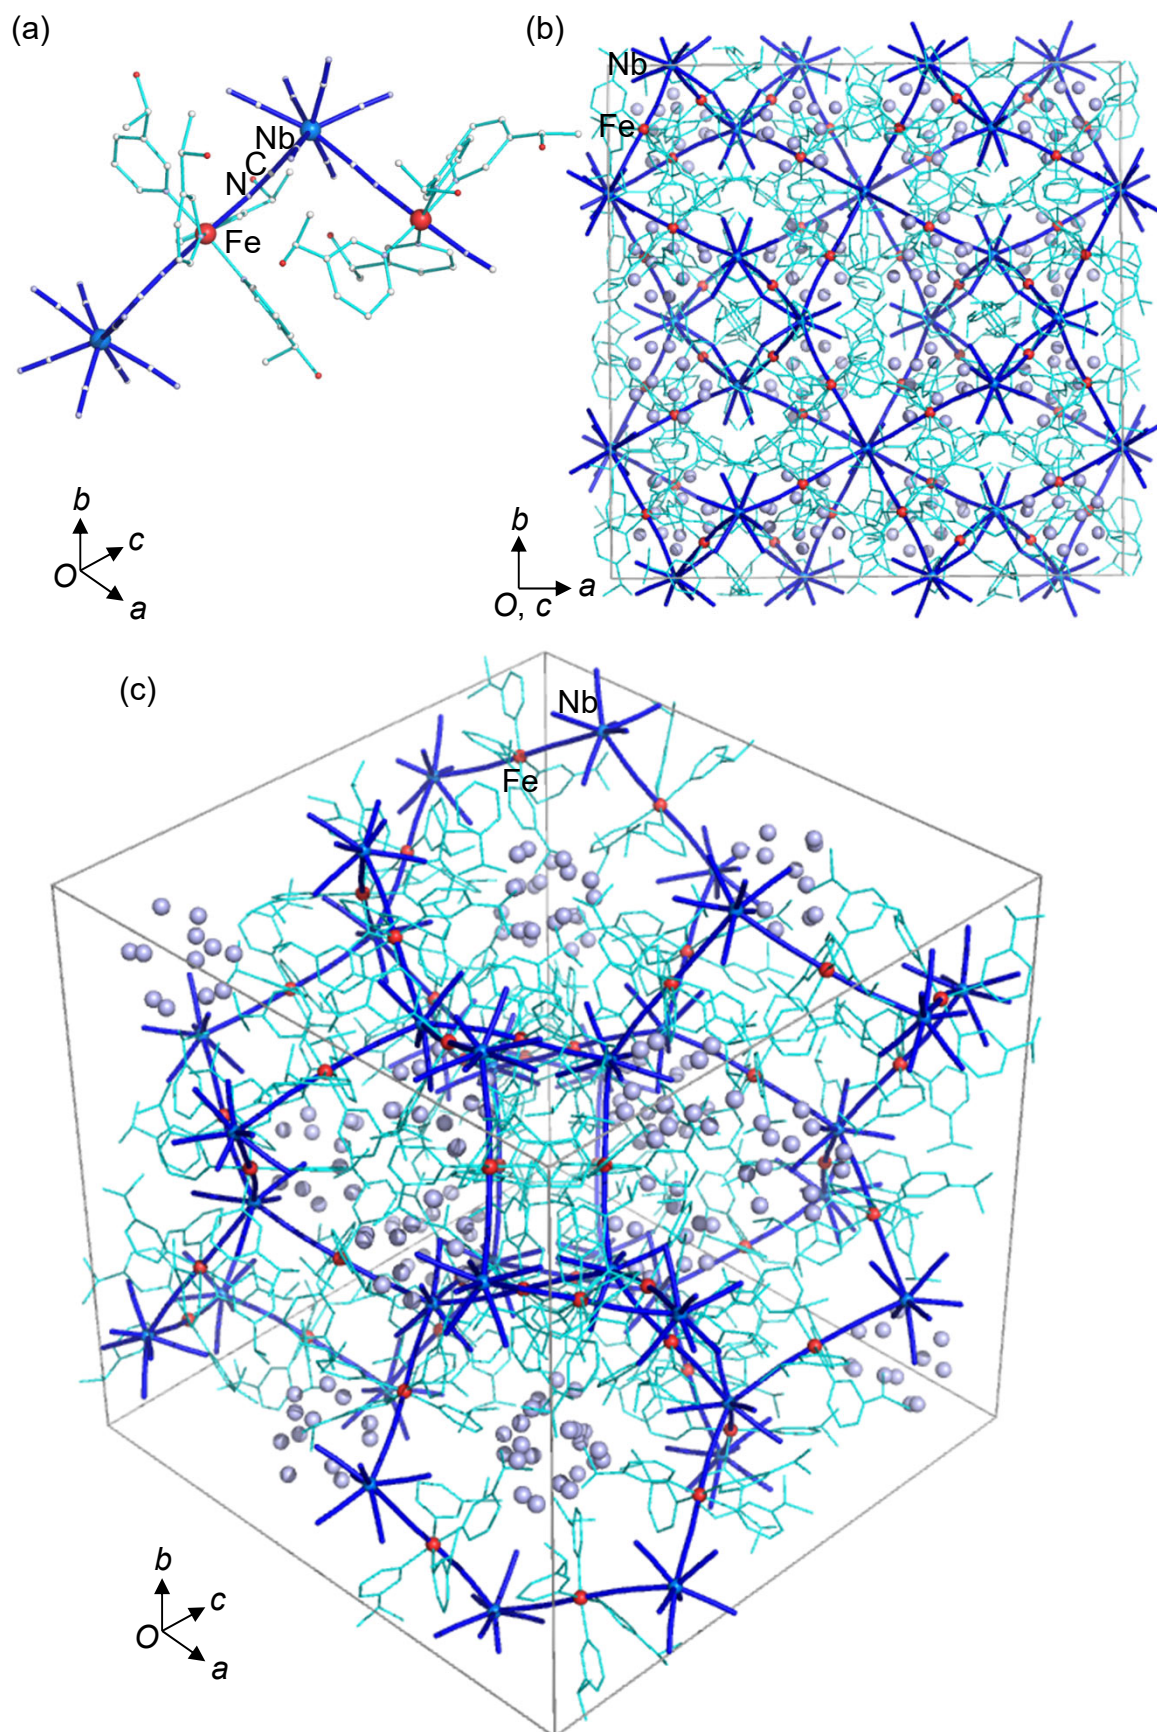

**Figure S8.** The structure based on the Rietveld analysis for *S*-FeNb. (a) Coordination structure around Fe and Nb. (b) View from the *c* axis. (c) View from the [111] direction. Red, blue, and light blue spheres show Fe, Nb, and O (water molecule) atoms, respectively. Light pink, blue thick, and gray lines represent *S*-1-(3-pyridyl)ethanol, 3-D cyanido-bridged coordination network, and the unite cell, respectively.

**Table S3.** Bond lengths (Å) between Fe-N atoms obtained the Rietveld analyses of the PXRD patterns of ***R*-FeNb** and ***S*-FeNb** at room temperature.

| <i>T</i> / K            | <b><i>R</i>-FeNb</b> | <b><i>S</i>-FeNb</b> |
|-------------------------|----------------------|----------------------|
| Fe1-N1                  | 2.20(3)              | 2.17(2)              |
| Fe1-N6                  | 2.09(3)              | 2.123(18)            |
| Fe1-N9                  | 2.207(16)            | 2.217(14)            |
| Fe1-N10                 | 2.234(15)            | 2.222(12)            |
| Fe1-N11                 | 2.198(16)            | 2.138(14)            |
| Fe1-N12                 | 2.087(13)            | 2.133(11)            |
| <b>Average of Fe1-N</b> | <b>2.17(2)</b>       | <b>2.167(15)</b>     |
| Fe2-N2                  | 2.13(2)              | 2.136(18)            |
| Fe2-N3                  | 2.16(2)              | 2.135(18)            |
| Fe2-N13                 | 2.175(16)            | 2.183(14)            |
| Fe2-N14                 | 2.223(15)            | 2.137(12)            |
| Fe2-N15                 | 2.150(15)            | 2.227(13)            |
| Fe2-N16                 | 2.088(13)            | 2.176(10)            |
| <b>Average of Fe2-N</b> | <b>2.154(17)</b>     | <b>2.166(14)</b>     |

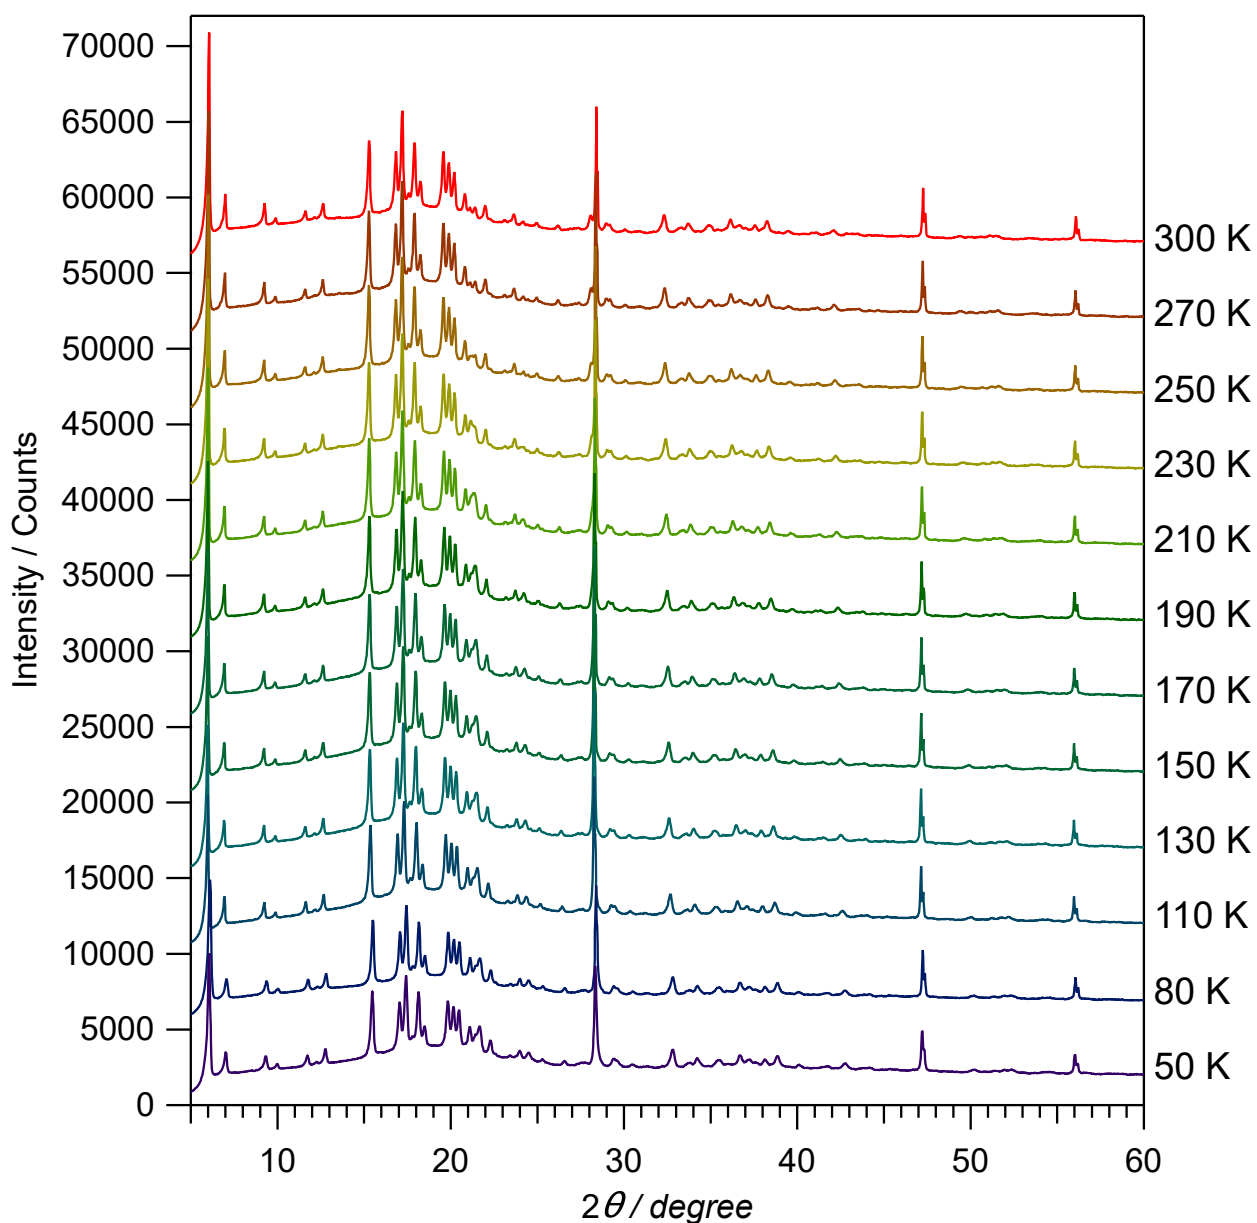

**Figure S9.** Variable-temperature PXRD patterns of *rac*-FeNb at respective temperatures. The sharp peaks at  $28^\circ$ ,  $47^\circ$ , and  $56^\circ$  represent the diffractions from the Si used for the calibration of temperature shift of the pattern in the applied measurement system.

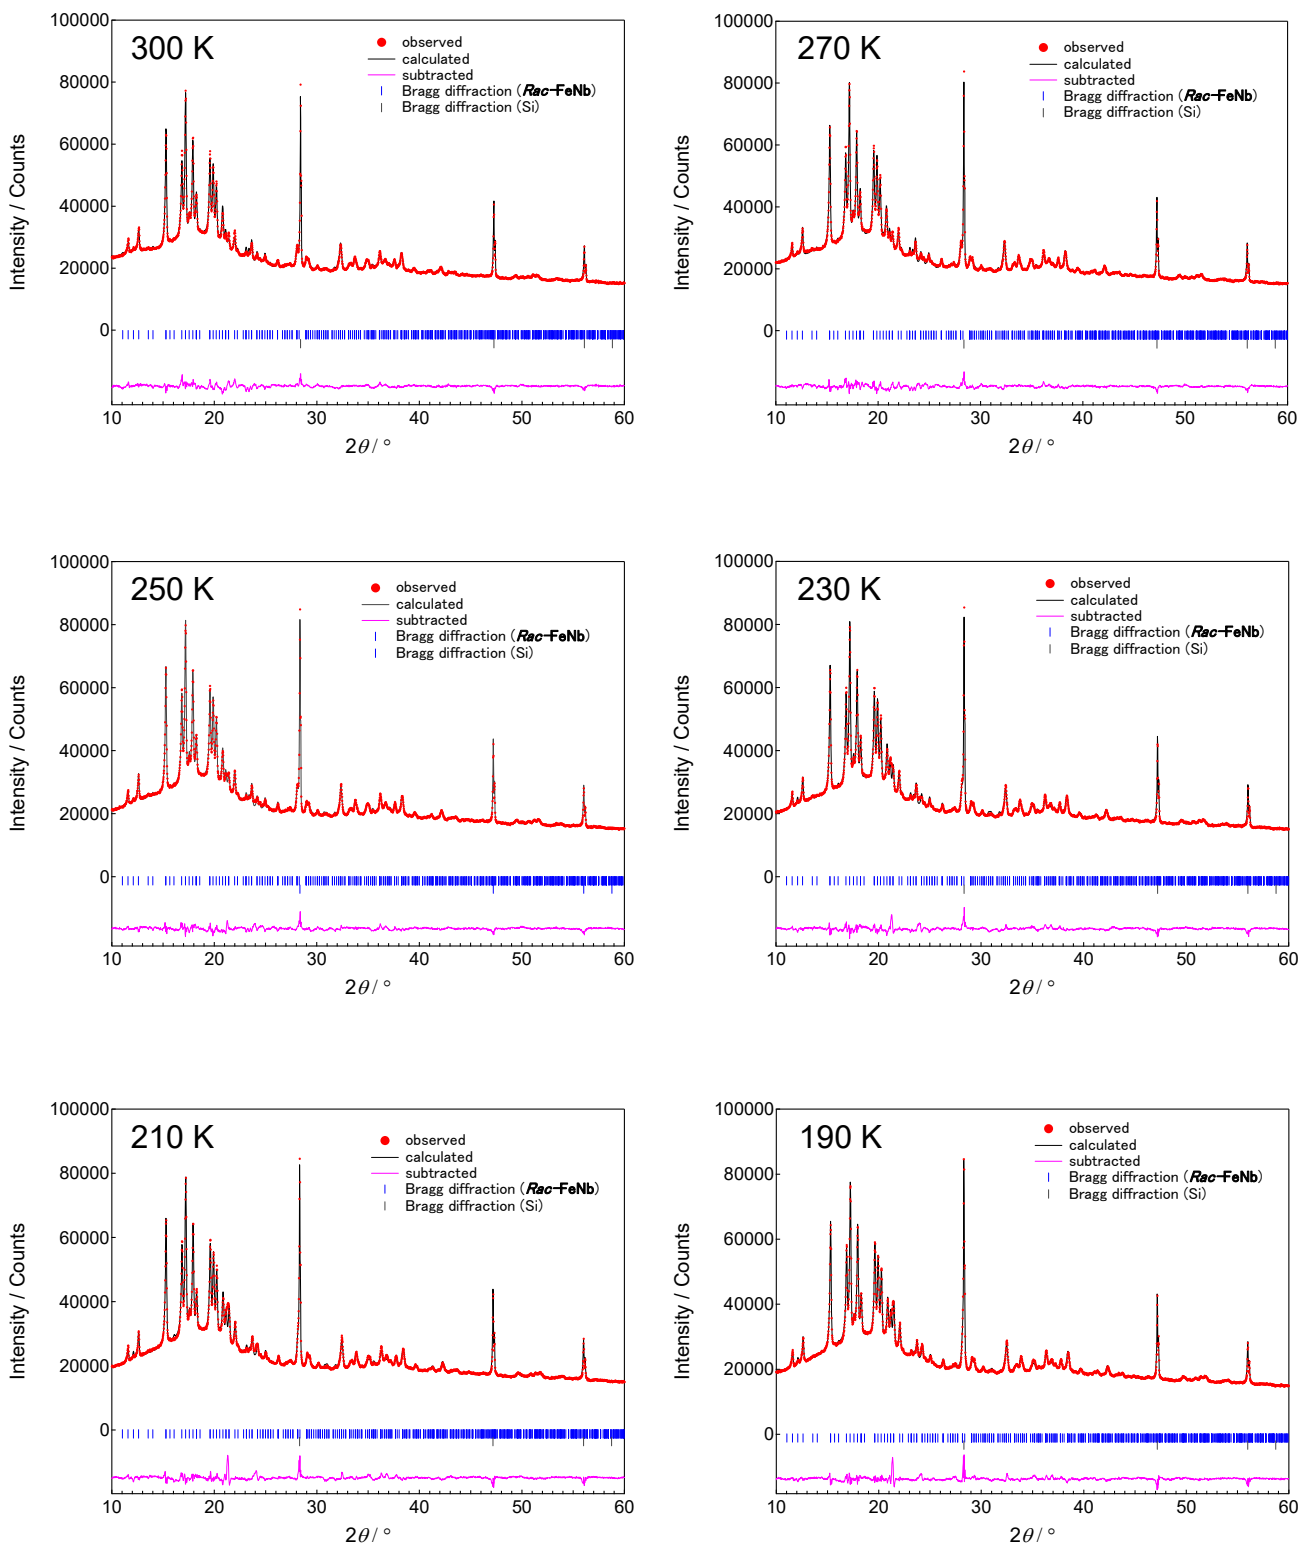

**Figure S10.** Rietveld analyses of the PXRD patterns of *rac*-FeNb at respective temperatures.

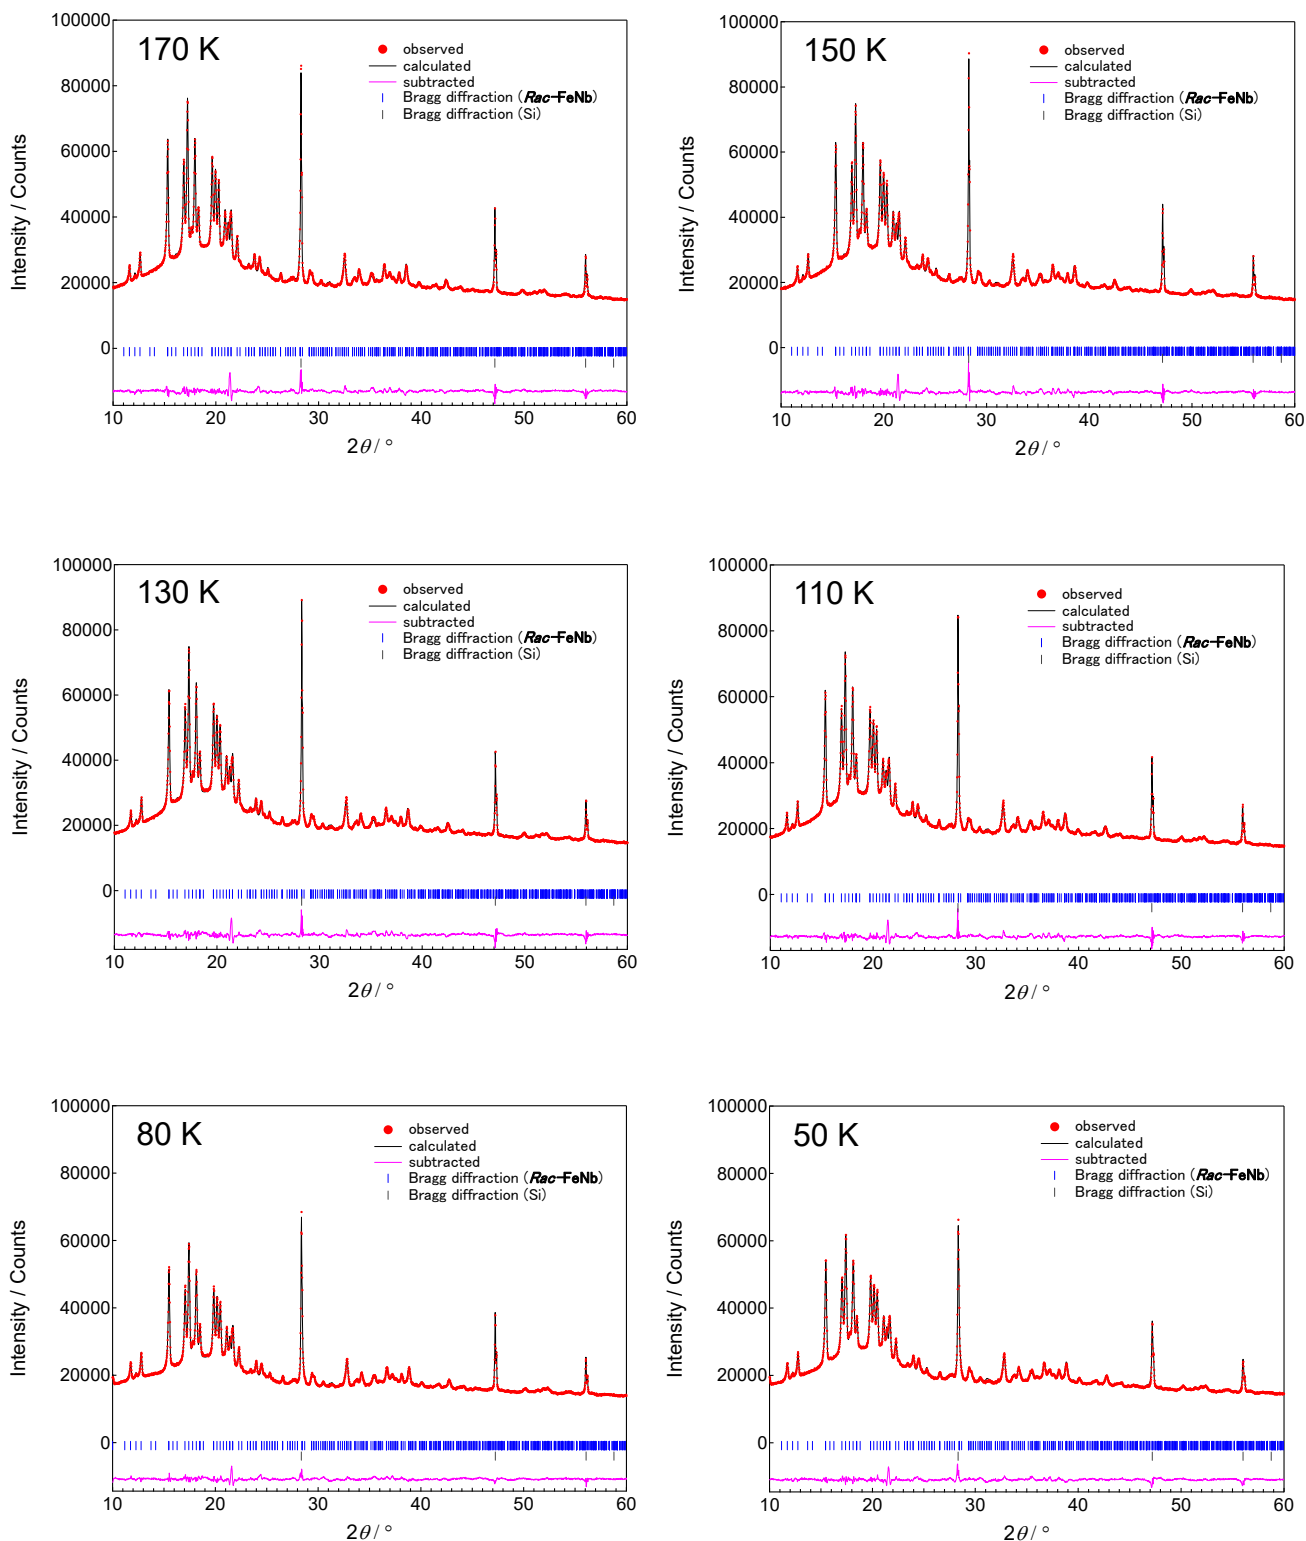

**Figure S10 (Continued).** Rietveld analyses of the PXRD patterns of *rac*-FeNb at respective temperatures.

**Table S4.** Crystallographic data from Rietveld analyses of the PXRD patterns of *rac*-FeNb at respective temperatures.

| $T / \text{K}$         | 300(2)       | 270(2)    | 250(2)    | 230(2)    | 210(2)    | 190(2)    |
|------------------------|--------------|-----------|-----------|-----------|-----------|-----------|
| Space group            | $Ia\bar{3}d$ |           |           |           |           |           |
| $a / \text{\AA}$       | 35.645(2)    | 35.592(2) | 35.548(2) | 35.493(2) | 35.432(2) | 35.361(2) |
| $V / \text{\AA}^3$     | 45291(3)     | 45084(3)  | 44918(3)  | 44711(4)  | 44483(4)  | 44217(3)  |
| $d / \text{g cm}^{-3}$ | 1.33         | 1.33      | 1.34      | 1.34      | 1.35      | 1.36      |
| $S$                    | 2.79         | 2.64      | 2.66      | 3.18      | 3.47      | 3.30      |
| $Z$                    | 24           |           |           |           |           |           |
| $R_p$                  | 0.0136       | 0.0133    | 0.0130    | 0.0152    | 0.0152    | 0.0154    |
| $R_{wp}$               | 0.0185       | 0.0175    | 0.0176    | 0.0210    | 0.0230    | 0.0219    |

| $T / \text{K}$         | 170(2)       | 150(2)    | 130(2)     | 110(2)    | 80(2)     | 50(2)     |
|------------------------|--------------|-----------|------------|-----------|-----------|-----------|
| Space group            | $Ia\bar{3}d$ |           |            |           |           |           |
| $a / \text{\AA}$       | 35.295(2)    | 35.239(1) | 35.2004(9) | 35.134(1) | 35.091(2) | 35.048(2) |
| $V / \text{\AA}^3$     | 43968(4)     | 43758(4)  | 43616(2)   | 43368(3)  | 43211(3)  | 43051(4)  |
| $d / \text{g cm}^{-3}$ | 1.37         | 1.37      | 1.38       | 1.38      | 1.39      | 1.39      |
| $S$                    | 3.42         | 3.11      | 3.13       | 2.92      | 2.38      | 2.58      |
| $Z$                    | 24           |           |            |           |           |           |
| $R_p$                  | 0.0136       | 0.0137    | 0.0143     | 0.0133    | 0.0121    | 0.0121    |
| $R_{wp}$               | 0.0207       | 0.0208    | 0.0210     | 0.0197    | 0.0170    | 0.0178    |

**Table S5.** Bond lengths (Å) between Fe-N atoms obtained the Rietveld analyses of the PXRD patterns of *rac*-FeNb at respective temperatures.

|                         |              |              |              |              |              |              |
|-------------------------|--------------|--------------|--------------|--------------|--------------|--------------|
| <i>T</i> / K            | 300          | 270          | 250          | 230          | 210          | 190          |
| Fe-N1                   | 2.139        | 2.147        | 2.151        | 2.146        | 2.133        | 2.121        |
| Fe-N3                   | 2.166        | 2.148        | 2.139        | 2.136        | 2.135        | 2.129        |
| Fe-N4                   | 2.192        | 2.190        | 2.200        | 2.194        | 2.190        | 2.186        |
| Fe-N5                   | 2.187        | 2.179        | 2.149        | 2.140        | 2.097        | 2.088        |
| <b>Average of Fe1-N</b> | <b>2.165</b> | <b>2.160</b> | <b>2.155</b> | <b>2.150</b> | <b>2.137</b> | <b>2.129</b> |
| <i>T</i> / K            | 170          | 150          | 130          | 110          | 80           | 50           |
| Fe-N1                   | 2.102        | 2.084        | 2.080        | 2.065        | 2.063        | 2.053        |
| Fe-N3                   | 2.131        | 2.131        | 2.125        | 2.126        | 2.110        | 2.112        |
| Fe-N4                   | 2.175        | 2.171        | 2.170        | 2.154        | 2.107        | 2.096        |
| Fe-N5                   | 2.086        | 2.072        | 2.068        | 2.061        | 2.052        | 2.040        |
| <b>Average of Fe-N</b>  | <b>2.121</b> | <b>2.112</b> | <b>2.108</b> | <b>2.099</b> | <b>2.084</b> | <b>2.078</b> |

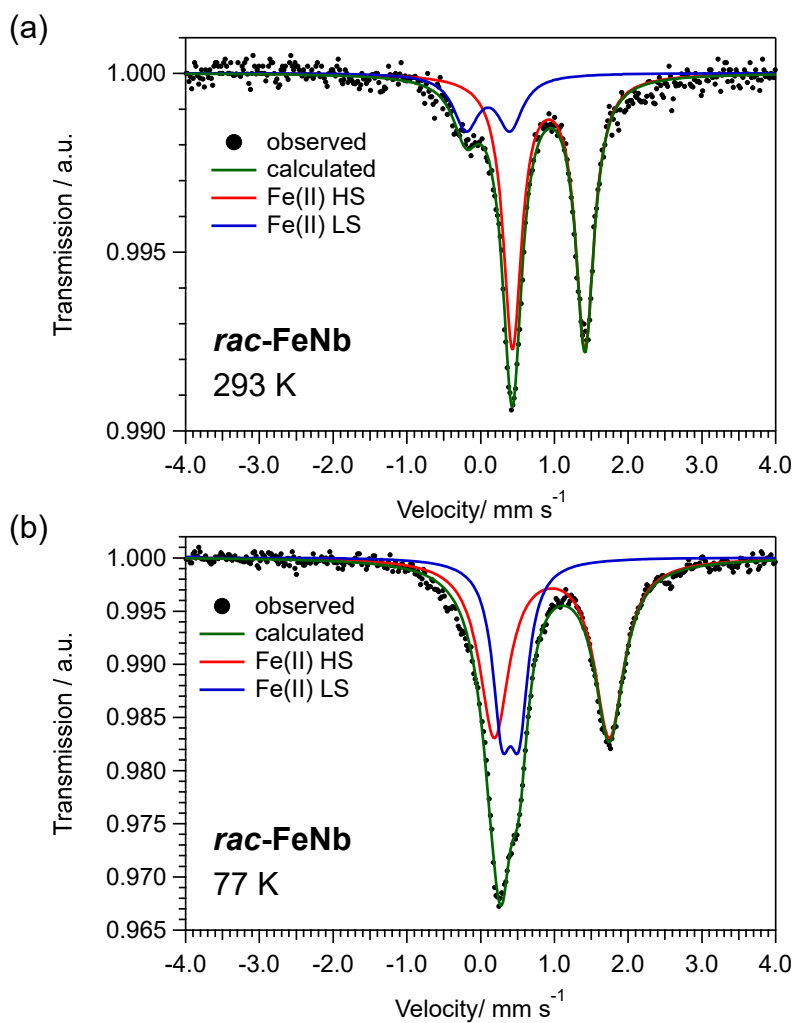

**Figure S11.**  $^{57}\text{Fe}$  Mössbauer spectra of *rac*-FeNb at 293 K (a) and 77 K (b). Black dots represent observed data. Green line shows the total calculated curve deconvoluted into the  $\text{Fe}^{\text{II}}_{\text{HS}}$  doublets (Red and orange lines) and the  $\text{Fe}^{\text{II}}_{\text{LS}}$  doublet (blue line).



**Table S6.**  $^{57}\text{Fe}$  Mössbauer spectra parameters for *rac*-FeNb.

| Compound         | $T$<br>(K) | Assignment of<br>Fe sites                    | $\delta$<br>(mm s $^{-1}$ ) | $\Delta E_Q$<br>(mm s $^{-1}$ ) | $\Gamma$<br>(mm s $^{-1}$ ) | Fraction<br>(%) |
|------------------|------------|----------------------------------------------|-----------------------------|---------------------------------|-----------------------------|-----------------|
| <i>rac</i> -FeNb | 293        | Fe $^{\text{II}}_{\text{HS}}$<br>(doublet 1) | 1.03(1)                     | 0.98(2)                         | 0.15(1)                     | 79              |
|                  |            | Fe $^{\text{II}}_{\text{LS}}$<br>(doublet 2) | 0.21(6)                     | 0.6(1)                          | 0.21(4)                     | 21              |
|                  | 77         | Fe $^{\text{II}}_{\text{HS}}$<br>(doublet 1) | 1.07(1)                     | 1.56(1)                         | 0.24 (1)                    | 65              |
|                  |            | Fe $^{\text{II}}_{\text{LS}}$<br>(doublet 2) | 0.51(1)                     | 0.23(1)                         | 0.15(1)                     | 35              |

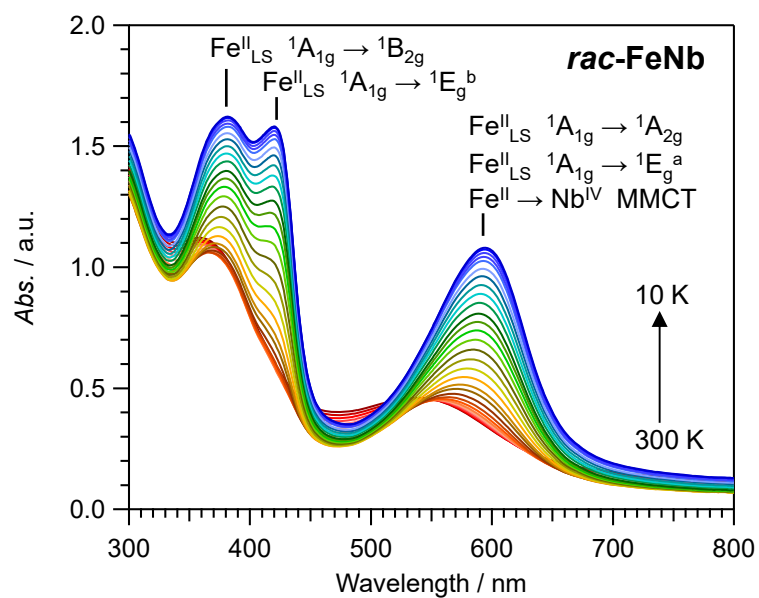

**Figure S12.** Variable-temperature solid-state UV-vis absorption spectra of *rac*-FeNb from 300 K to 10 K.

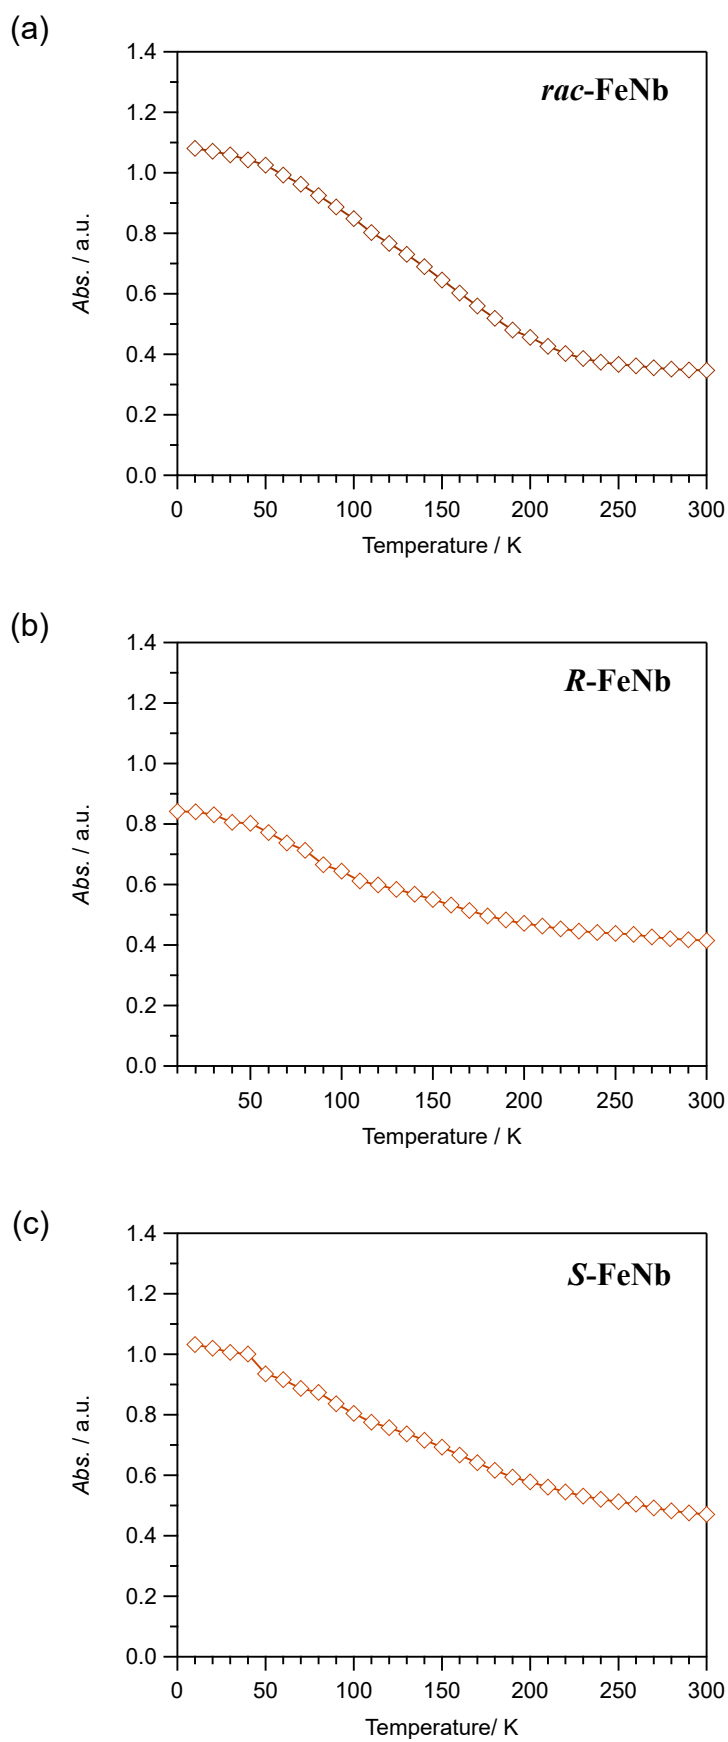

**Figure S13.** Temperature dependences of the absorbances at 595 nm in the solid-state UV–vis absorption spectra of *rac*-FeNb, *R*-FeNb and *S*-FeNb.

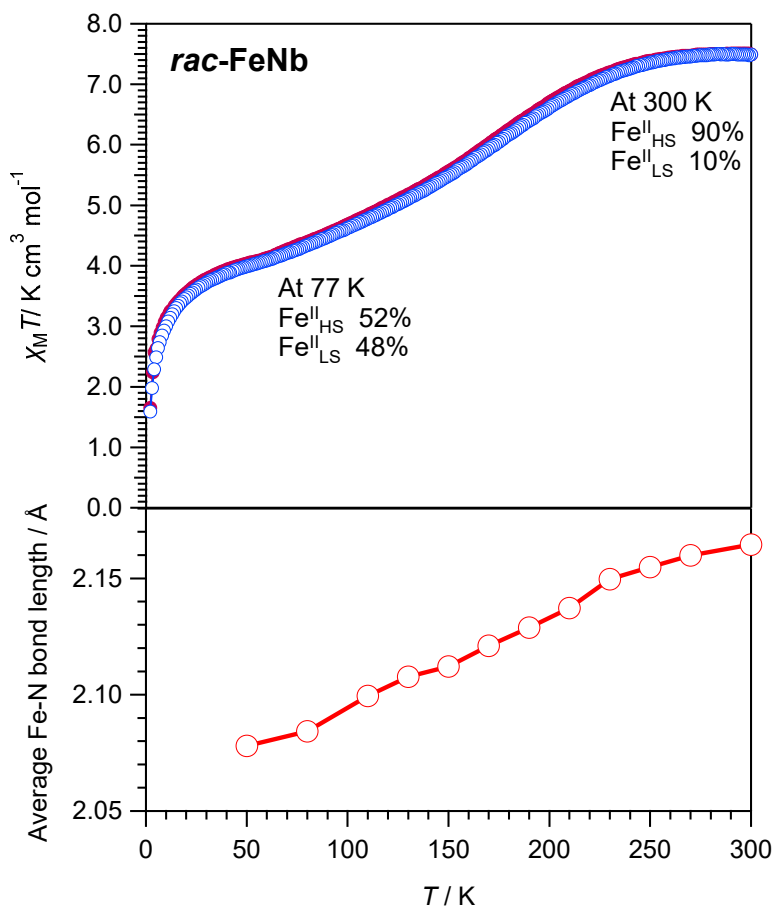

**Figure S14.** The  $\chi_M T$  vs  $T$  plot product of *rac*-FeNb under 5000 Oe. Blue open and red circles indicate the cooling and heating processes, respectively (top). Temperature-dependence of the average Fe-N bond length in the crystal structure of *rac*-FeNb (bottom).

The  $\chi_M T$ - $T$  plot above 290 K and from 10 to 50 K are analyzed based on the following Hamiltonian,

$$H = \kappa\lambda\mathbf{L} \cdot \mathbf{S} + \Delta \left( L_z^2 - \frac{2}{3} \right)$$

where  $\kappa$ ,  $\lambda$ , and  $\Delta$  are orbital reduction factor, spin-orbit coupling parameter, and axial splitting parameters, respectively. The molar magnetic susceptibility ( $\chi_M$ ) is obtained by Van-Vleck equation.<sup>S3</sup> Furthermore, superexchange interaction between Fe and Nb is included by applying the molecular field theory based on the following spin Hamiltonian,

$$H = -JS_{\text{Fe}}S_{\text{Nb}}$$

The  $\chi_M T$  value from 10 to 50 K is analyzed by multiplying high spin fraction ( $f_{\text{HS}}$ ) to the calculated  $\chi_M T$  value of high temperature region.

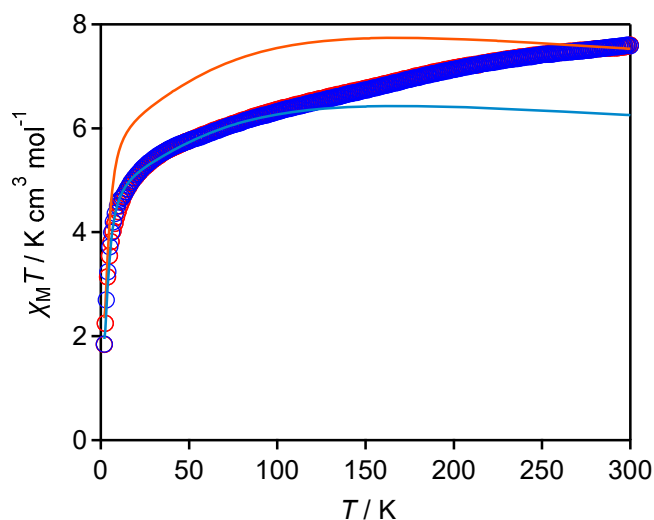

**Figure S15.** Magnetic analysis for the  $\chi_M T$ - $T$  plot of **R-FeNb**. Red and blue plots are  $\chi_M T$  values in the cooling and warming processes, respectively. The  $\chi_M T$ - $T$  plot above 290 K is reproduced by using parameters,  $\kappa = 1$ ,  $\lambda = -100 \text{ cm}^{-1}$ ,  $\Delta = 105 \text{ cm}^{-1}$ ,  $J = -0.44 \text{ cm}^{-1}$ , and  $f_{\text{HS}} = 0.91$  (orange line). The plot in the range from 10 to 50 K is reproduced by using  $f_{\text{HS}} = 0.76$  and the same parameters of  $\kappa$ ,  $\lambda$ , and  $\Delta$  as above 290 K (light blue line).

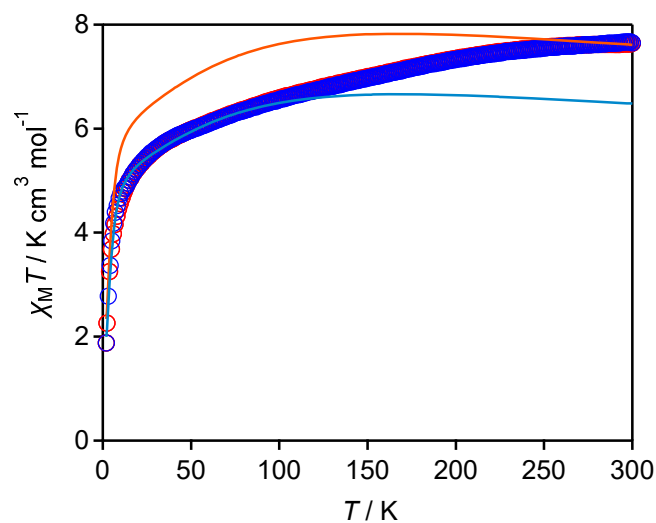

**Figure S16.** Magnetic analysis for the  $\chi_M T$ - $T$  plot of **S-FeNb**. Red and blue plots are  $\chi_M T$  values in the cooling and warming processes, respectively. The  $\chi_M T$ - $T$  plot above 290 K is reproduced by using parameters,  $\kappa = 1$ ,  $\lambda = -100 \text{ cm}^{-1}$ ,  $\Delta = 106 \text{ cm}^{-1}$ ,  $J = -0.44 \text{ cm}^{-1}$ , and  $f_{\text{HS}} = 0.92$  (orange line). The plot in the range from 10 to 50 K is reproduced by using  $f_{\text{HS}} = 0.78$  and the same parameters of  $\kappa$ ,  $\lambda$ , and  $\Delta$  as above 290 K (light blue line).

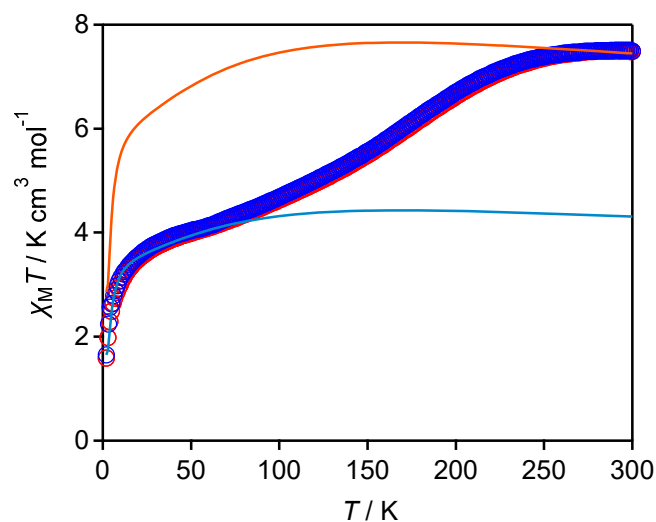

**Figure S17.** Magnetic analysis for the  $\chi_M T$ - $T$  plot of **rac-FeNb**. Red and blue plots are  $\chi_M T$  values in the cooling and warming processes, respectively. The  $\chi_M T$ - $T$  plot above 290 K is reproduced by using parameters,  $\kappa = 1$ ,  $\lambda = -100 \text{ cm}^{-1}$ ,  $\Delta = 97 \text{ cm}^{-1}$ ,  $J = -0.48 \text{ cm}^{-1}$ , and  $f_{\text{HS}} = 0.90$  (orange line). The plot in the range from 10 to 50 K is reproduced by using  $f_{\text{HS}} = 0.52$  and the same parameters of  $\kappa$ ,  $\lambda$ , and  $\Delta$  as above 290 K (light blue line).

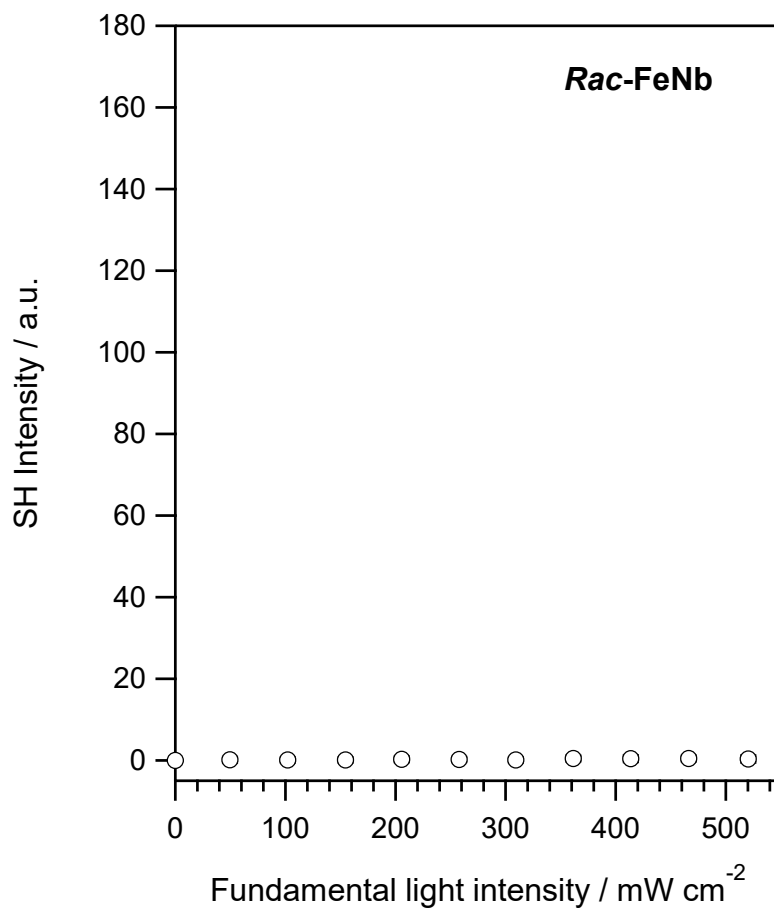

**Figure S18.** SH intensity vs incident light power (1040 nm) plot of *rac-FeNb* at 293 K.
